# Supplementary material
Source: publisher figshare collection journal article supplement (https://geolsoc.figshare.com/ndownloader/files/14229752)
Supplement: Supplementary file 1 [file 14229752]

## Sheet: Granite and AF granites
Table S5. Mineral chemistry of feldspars from granites and alkali feldspar granites
Sample	A3																							A4																						A9
Type	Pl1							Pl2					Kfs_i			Kfs_c		Pl_string			Pl_patch			Pl*1							Pl*2			Kfs*_i			Kfs*_c			Pl_string			Pl_patch			Pl*1
Location	ICO	±1s	OCO	±1s	RIM	±1s		ICO	OCO	±1s	RIM		INCL	±1s		INTERST			±1s			±1s		ICO	±1s	OCO	±1s	RIM	±1s			±1s		INCL	±1s		INTERST	±1s			±1s			±1s		ICO	±1s	OCO	±1s
n	7		11		3			1	2		1		4			1		3			2			2		2		2			2			2			2			7			8			2		2
SiO2 (wt%)	64.73	1.69411	64.95	1.56947	64.67	0.642988		65.28	66.98	0.855599	67.27		65.21	0.27313		64.6		67.67	1.23856		67.65	0.311127		65.89	0.841457	66.15	0.268701	68.47	1.26572		67.66	1.55563		65.57	0.388909		66.25	0.410122		67.9614	0.404534		67.7975	0.354955		67.04	0.445477	67.07	1.09602
Al2O3	22.43	0.806905	21.8	1.00456	22.18	0.915715		20.8	20.57	0.424264	19.84		19.35	0.592811		19.14		19.88	0.21		19.38	0.0565685		21.93	0.367696	21.35	0.113137	20.37	0.480833		20.59	0.982878		18.91	0.176777		18.94	0.205061		19.4543	0.207835		19.5188	0.301919		21.74	0.46669	21.12	0.947523
CaO	3.35	0.875037	3.44	1.67436	3.22	1.11072		2.52	1.72	0.254558	1.1		0.09	0.0963933		0.06		1.00333	0.12897		0.765	0.0919239		2.79	0.0494975	1.89	1.0748	1.33	0.381838		1.4	1.0748		0.14	0.0494975		0.05	0.0282843		0.575714	0.179244		0.575	0.236824		2.42	0.629325	2.09	1.03238
Na2O	9.27	0.716729	9.57	0.681206	9.71	1.54118		11.05	10.3	0.0636396	11.65		0.88	0.255131		1		11.0433	1.01864		11.83	0.169706		9.19	0.403051	10.23	0.813173	9.52	0.325269		10.16	0.509117		0.78	0.0919239		0.65	0.0353553		11.4786	0.204241		11.7112	0.273623		8.23	0.205061	9.49	0.954594
K2O	0.23	0.076532	0.23	0.0931763	0.21	0.131149		0.35	0.44	0.0989949	0.15		14.46	0.597048		15.19		0.4	0.0888819		0.37	0		0.22	0.0212132	0.39	0.106066	0.31	0.0707107		0.19	0		14.61	0.353553		14.12	0.13435		0.53	0.255343		0.39875	0.0649038		0.58	0.438406	0.24	0.0777817
Total	100.01		99.99		99.99			100	100.01		100.01		99.99			99.99		99.9967			99.995			100.02		100.01		100			100			99.99			100			100			100.001			100.01		100.01
Si	2.85	0.0577144	2.86	0.0514147	2.85	0.0295353		2.886	2.94	0.0282843	2.954		2.98	0.0123119		2.98		2.966	0.0363731		2.972	0.00989949		2.89	0.0282843	2.9	0.0113137	2.98	0.0403051		2.96	0.0558614		3	0.0113137		3.02	0.013435		2.98071	0.012619		2.97463	0.013585		2.92	0.0219203	2.93	0.0431335
Al	1.16	0.0472738	1.13	0.0514515	1.15	0.0455741		1.083	1.06	0.0247487	1.026		1.04	0.0278373		1.04		1.02633	0.0162583		1.003	0.00424264		1.13	0.0226274	1.1	0.00636396	1.04	0.0296985		1.06	0.0544472		1.02	0.0113137		1.02	0.0127279		1.00486	0.0110669		1.00862	0.0159726		1.12	0.0233345	1.09	0.0509117
Ca	0.16	0.0416813	0.16	0.0814377	0.15	0.0524309		0.119	0.08	0.0120208	0.052		0.01	0.00479583		0		0.047	0.006245		0.036	0.00424264		0.13	0.00282843	0.09	0.0509117	0.06	0.0183848		0.07	0.0502046		0.01	0.00212132		0	0.00141421		0.0268571	0.00855236		0.027	0.0113137		0.11	0.0296985	0.1	0.0480833
Na	0.79	0.064061	0.82	0.0580789	0.83	0.133899		0.947	0.88	0.00777817	0.992		0.08	0.0225758		0.09		0.939	0.0920489		1.008	0.0155563		0.78	0.0367696	0.87	0.0685894	0.8	0.0318198		0.86	0.039598		0.01	0.00777817		0.06	0.00282843		0.976286	0.0189184		0.99625	0.0236869		0.7	0.0176777	0.8	0.0799031
K	0.01	0.00433699	0.01	0.00502901	0.01	0.00754983		0.02	0.03	0.00565685	0.008		0.84	0.03869		0.9		0.0223333	0.0051316		0.021	0		0.01	0.00141421	0.02	0.00636396	0.02	0.00424264		0.01	0		0.86	0.0226274		0.82	0.00919239		0.0297143	0.0143145		0.022375	0.00362284		0.03	0.0247487	0.01	0.00424264
Total	4.97		4.98		4.99			5.055	4.99		5.032		4.95			5.01		5.00067			5.04			4.94		4.98		4.9			4.96			4.9			4.92			5.01843			5.02888			4.88		4.93
Ab	82.27	3.97732	82.6	6.25987	83.13	5.87736		87.2	89.3	1.48492	94.3		8.4	2.21058		9		93.1333	0.568624		94.65	0.353553		84.5	0.282843	88.7	4.80833	91.1	1.9799		91.85	5.3033		7.4	0.989949		6.45	0.212132		94.5429	1.15305		95.2875	1.18736		82.7	0.848528	87.8	6.08112
An	16.39	4.29474	16.07	6.30477	15.67	6.39713		11	8.2	0.989949	4.9		0.48	0.525198		0.3		4.63333	0.208167		3.35	0.353553		14.2	0.282843	9.15	5.44472	6.95	1.62635		6.95	5.3033		0.7	0.282843		0.2	0.141421		2.58571	0.813283		2.5875	1.12178		13.45	3.74767	10.8	5.51543
Or	1.34	0.485994	1.34	0.551856	1.13	0.665833		1.8	2.55	0.494975	0.8		91.08	1.64595		90.7		2.23333	0.757188		1.95	0.0707107		1.3	0.141421	2.2	0.565685	1.95	0.353553		1.2	0		91.9	1.13137		93.3	0.424264		2.85714	1.30749		2.15	0.358569		3.85	2.89914	1.45	0.494975
Total	100		100.01		99.93			100	100.05		100		99.96			100		100			99.95			100		100.05		100			100			100			99.95			99.9857			100.025			100		100.05
Mean values given; n = number of analyses
Pl1 = Primary plagioclase
Pl2 = Secondary plagioclase
Kfs_i = K - feldspar included in plagioclase
Kfs_c = Interstitial K - feldspar
Pl_string = string pertite
Pl_patch = patch pertite
Pl*, Kfs* = from Stella (2010)
ICO = inner core
OCO = outer core
[truncated: 12 more columns]
